# Supplementary material
Source: PubMed Central journal article supplement (PMC3296248)
Supplement: supp_111.136291_FigureS2.pdf [file supp_111.136291_FigureS2.pdf]

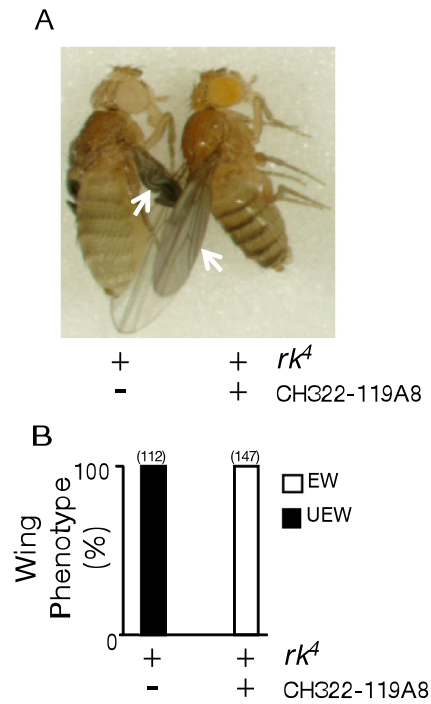

**Figure S2** P[acman] clone CH322-119A8, which includes the entire *rk* gene locus as well as 5' and 3' flanking regions, rescues the wing expansion deficits of *rk*<sup>4</sup> mutants. (A) Unlike flies carrying only the *rk*<sup>4</sup> mutation (left), flies also bearing a genomic copy of CH322-119A8 (right) expand their wings normally (arrows). (B) Bargraph summarizing the success of rescue with CH322-119A8. Numbers in parentheses indicate the number of flies scored of each genotype.
